# Supplementary material for: Seasonal Differences in the Composition of Organic Aerosols in Beijing: a Study by Direct Infusion Ultrahigh Resolution Mass Spectrometry
Source: Copernicus journal article supplement (doi:10.5194/acp-2019-1009), 2020-01-08
Supplement: Supplementary file 1 [file acp-2019-1009-supplement.pdf]

# Supplement

Table S1: final sample volume calculations, starred values indicate filters with low mass loadings, where two punches were used to obtain the extract.

| Data set    | Sample code | Date       | Mass per Punch [ $\mu\text{g}$ ] | Final volume [ $\mu\text{l}$ ] | Final Concentration [ $\mu\text{g}\cdot\mu\text{l}^{-1}$ ] |
|-------------|-------------|------------|----------------------------------|--------------------------------|------------------------------------------------------------|
| Winter High | 026         | 03/12/2016 | 1584.5                           | 1800                           | 0.88                                                       |
| Winter High | 019         | 26/11/2016 | 1371.1                           | 1500                           | 0.91                                                       |
| Winter High | 018         | 25/11/2016 | 1214.6                           | 1300                           | 0.93                                                       |
| Winter High | 002         | 09/11/2016 | 1186.0                           | 1000                           | 1.19                                                       |
| Winter High | 027         | 04/12/2016 | 850.7                            | 1000                           | 0.85                                                       |
| Winter Low  | 028         | 05/12/2016 | 130.3                            | 150                            | 0.87                                                       |
| Winter Low  | 016         | 23/11/2016 | 101.5                            | 120                            | 0.85                                                       |
| Winter Low  | 007         | 14/11/2016 | 75.3*                            | 180                            | 0.84                                                       |
| Winter Low  | 015         | 22/11/2016 | 66.9*                            | 120                            | 1.11                                                       |
| Winter Low  | 014         | 21/11/2016 | 60.3*                            | 120                            | 1.00                                                       |
| Summer High | 007         | 27/05/2017 | 546.3                            | 450                            | 1.21                                                       |
| Summer High | 029         | 17/06/2017 | 471.7                            | 450                            | 1.05                                                       |
| Summer High | 010         | 30/05/2017 | 321.0                            | 270                            | 1.19                                                       |
| Summer High | 017         | 06/06/2017 | 311.9                            | 270                            | 1.16                                                       |
| Summer High | 028         | 16/06/2017 | 290.7                            | 270                            | 1.08                                                       |
| Summer Low  | 012         | 01/06/2017 | 116.2*                           | 200                            | 1.16                                                       |
| Summer Low  | 020         | 08/06/2017 | 113.7*                           | 200                            | 1.14                                                       |
| Summer Low  | 003         | 23/05/2017 | 104.7*                           | 200                            | 1.05                                                       |
| Summer Low  | 035         | 23/06/2017 | 88.3*                            | 150                            | 1.18                                                       |
| Summer Low  | 004         | 24/05/2017 | 84.2*                            | 150                            | 1.12                                                       |

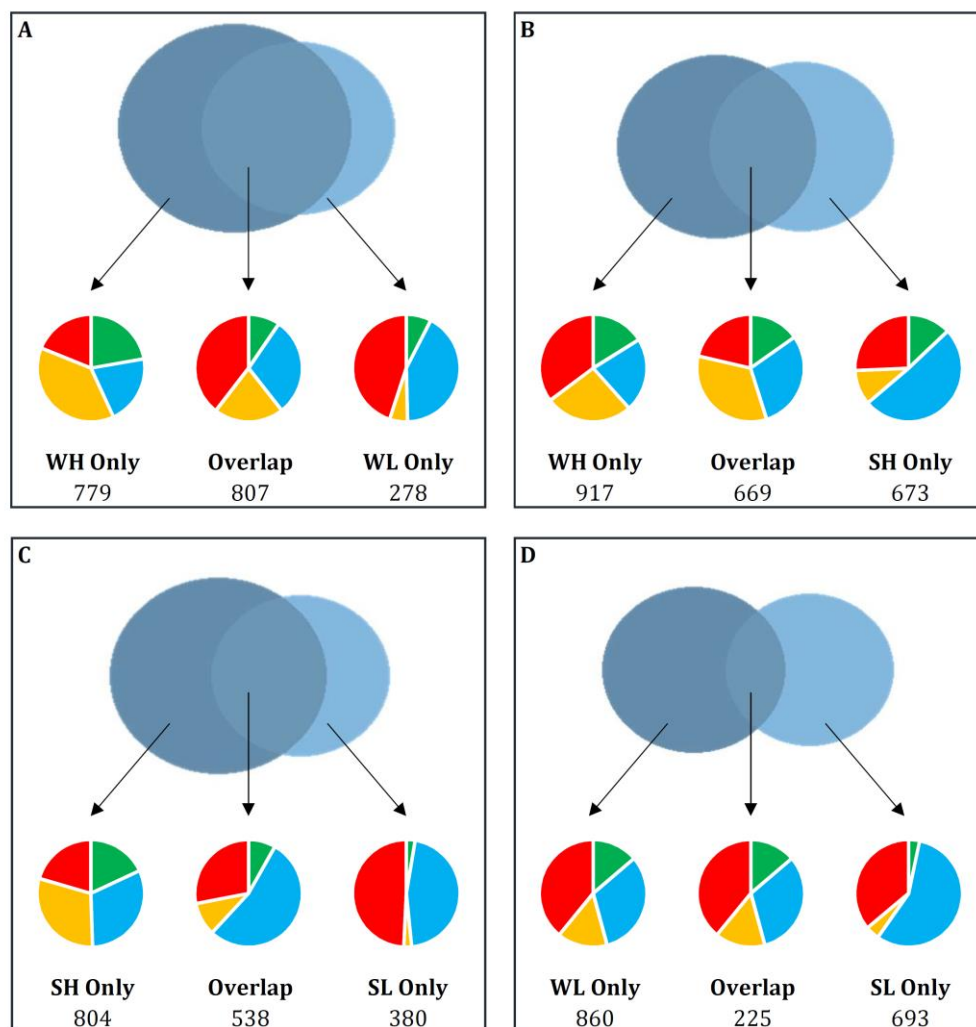

Figure S1: Venn diagrams illustrating how many molecular formulas the various samples have in common. The Pie charts indicate the relative distribution of compound groups CHO (red), CHON (blue), CHOS (yellow) and CHONS (green) present in each section of the venn diagram, while the numbers below indicate the absolute numbers of different assigned formulas.

Signal intensities in the low mass loading samples were generally lower despite the attempt to have similar concentrations of total organic carbon in all samples. If sulphur-containing compounds are generally close to the detection limit, this could lead to them being not detected in the low mass loading samples despite having similar concentrations. To ensure that that is not the case, each sample set was separated by intensity of the peaks in the mass spectrum and the number of peaks were counted. The number of peaks in the high pollution sample for each season was subtracted from that in the low pollution sample, then divided by the high pollution sample to give an indication of the fractional loss or gain. The findings, displayed in Table S2, show that a considerable proportion of both lower and higher intensity peaks for CHOS and CHONS decreased from WH to WL and from SH to SL. This gives evidence to suggest that it is not just an artefact of the measurement technique, but it is in fact representative of changes in the chemical composition of the samples collected.

Table S2: percentage change of different compound and intensity groupings from high to low pollution conditions for both winter and summer relative to the high pollution sample. For scale, Table S2B shows the high pollution samples from which the relative values were obtained.

| Intensity Group      | 100x(WL-WH)/WH |      |      |       |
|----------------------|----------------|------|------|-------|
|                      | CHO            | CHON | CHOS | CHONS |
| 1,000,000-10,000,000 | 100            | 40   | N/A  | N/A   |
| 100,000-1,000,000    | 255            | 275  | 800  | -67   |
| 50,000-100,000       | 148            | 250  | 17   | 300   |
| 10,000-50,000        | -4             | 81   | -52  | -26   |
| 5000-10,000          | 3              | -30  | -81  | -69   |
| 1000-5000            | -73            | -57  | -91  | -88   |

| 100x(SL-SH)/SH |      |      |       |
|----------------|------|------|-------|
| CHO            | CHON | CHOS | CHONS |
| 100            | 0    | -100 | N/A   |
| 4              | 63   | -78  | -14   |
| -13            | 263  | -80  | -36   |
| 15             | -5   | -81  | -68   |
| 5              | -23  | -71  | -94   |
| -38            | -68  | -45  | -91   |

| Intensity Group      | WH  |      |      |       |
|----------------------|-----|------|------|-------|
|                      | CHO | CHON | CHOS | CHONS |
| 1,000,000-10,000,000 | 1   | 5    | 0    | 0     |
| 100,000-1,000,000    | 11  | 8    | 2    | 3     |
| 50,000-100,000       | 21  | 6    | 23   | 2     |
| 10,000-50,000        | 229 | 73   | 230  | 68    |
| 5000-10,000          | 102 | 118  | 101  | 86    |
| 1000-5000            | 100 | 193  | 110  | 91    |

| SH  |      |      |       |
|-----|------|------|-------|
| CHO | CHON | CHOS | CHONS |
| 5   | 1    | 4    | 0     |
| 52  | 8    | 45   | 7     |
| 48  | 8    | 44   | 11    |
| 157 | 310  | 170  | 113   |
| 41  | 128  | 21   | 36    |
| 13  | 87   | 11   | 22    |

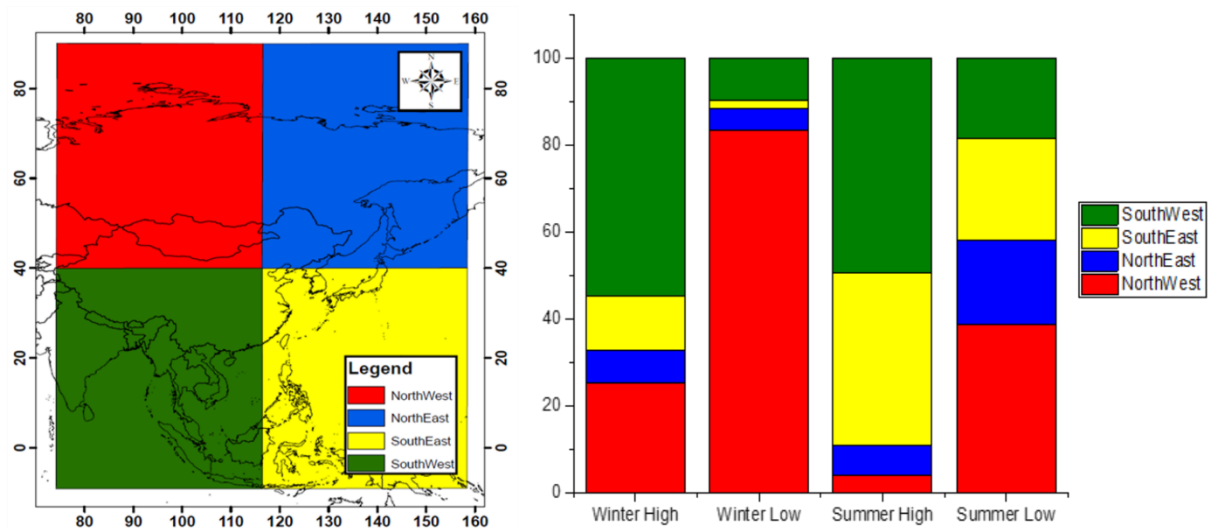

Figure S2: Percentage of time the air masses spent over specific regions for the different sampling condition. The centre of the map is located at the measurement site. Calculated via NAME model back trajectories.

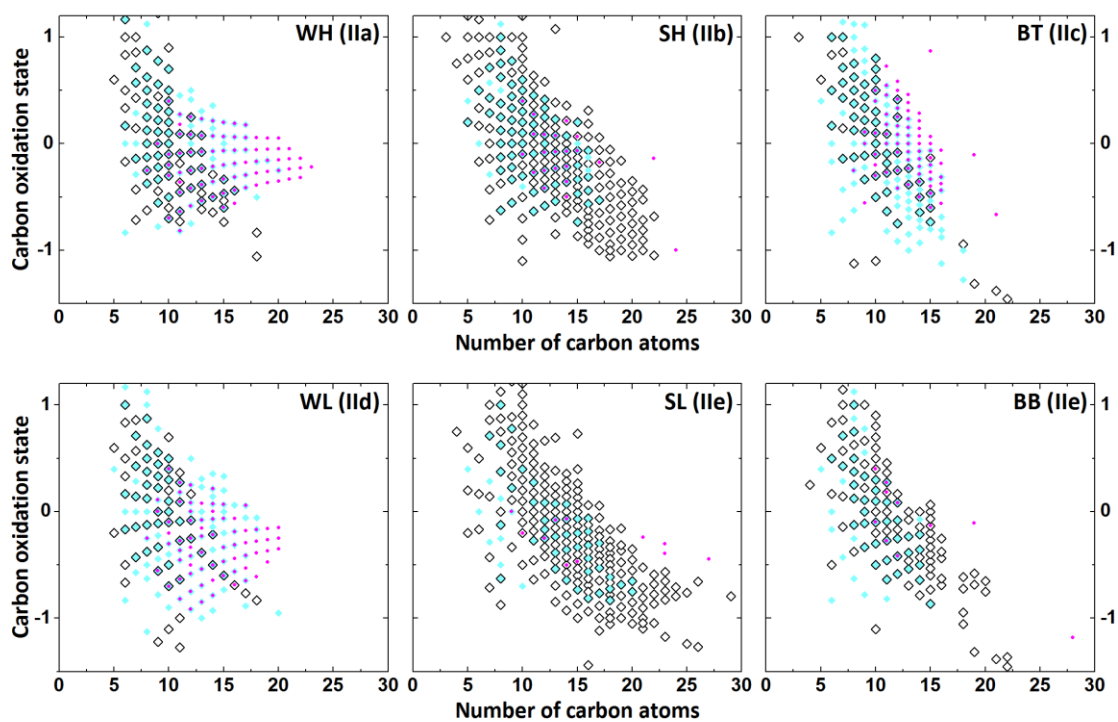

Figure S3: Plot of carbon oxidation state against carbon number for all CHON formulae in the WH, WL SH, SL, BT and BB samples. Polycyclic aromatic ( $2.7143 \leq X_c$ ), monocyclic aromatic ( $2.5000 \leq X_c \leq 2.7143$ ) and non-aromatic ( $X_c \leq 2.5000$ ) formulae are depicted as magenta circles, cyan diamonds and open black diamonds respectively.

## (I) CHO Compounds

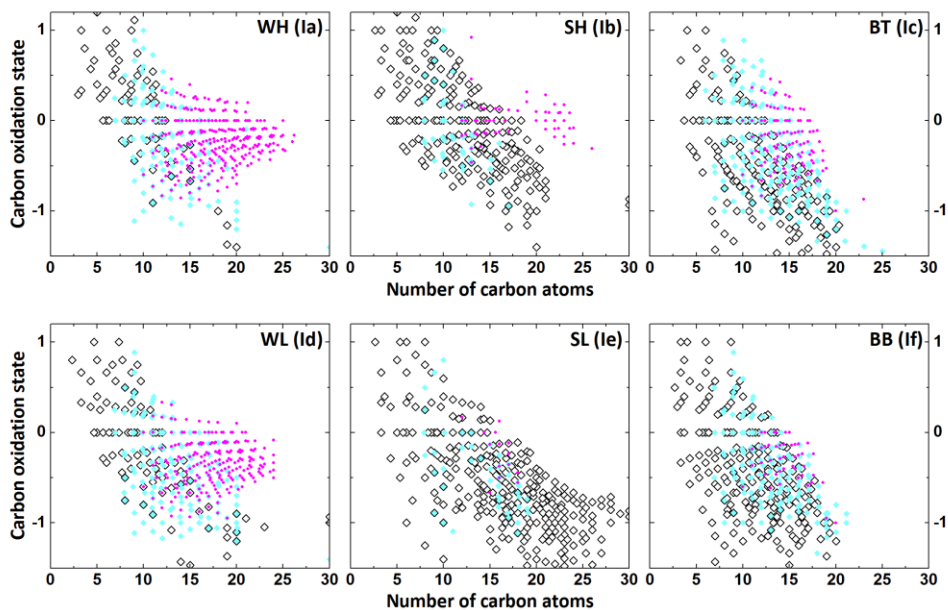

## (II) CHON Compounds

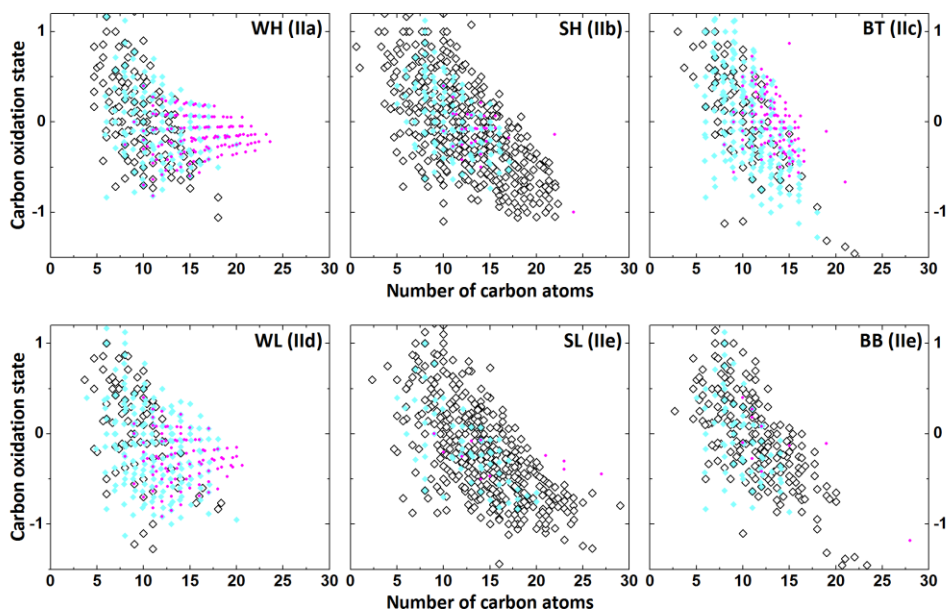

Figure S4: Plot of carbon oxidation state against carbon number for all CHO and CHON formulae in the WH, WL, SH, SL, BT and BB samples. Polycyclic aromatic ( $2.7143 \leq X_c$ ), monocyclic aromatic ( $2.5000 \leq X_c \leq 2.7143$ ) and non-aromatic ( $X_c \leq 2.5000$ ) formulae are depicted as magenta circles, cyan diamonds and open black diamonds respectively.

Table S3: Summary of statistics for the fits in Fig.8.

| <b>Plot</b>                                  | <b>Pearson's r</b> | <b>Adjusted R<sup>2</sup></b> | <b>ANOVA: slope significantly different from 0?</b> |
|----------------------------------------------|--------------------|-------------------------------|-----------------------------------------------------|
| a Winter CHOS/SO <sub>4</sub> <sup>2-</sup>  | 0.82019            | 0.6318                        | yes                                                 |
| a Winter CHONS/SO <sub>4</sub> <sup>2-</sup> | 0.79535            | 0.5866                        | yes                                                 |
| b Summer CHOS/SO <sub>4</sub> <sup>2-</sup>  | 0.52845            | 0.15914                       | no                                                  |
| b Summer CHONS/SO <sub>4</sub> <sup>2-</sup> | 0.40991            | 0.02936                       | no                                                  |
|                                              |                    |                               |                                                     |
| c Winter CHON/NO <sub>3</sub> <sup>-</sup>   | 0.13094            | -0.10571                      | no                                                  |
| c Winter CHONS/NO <sub>3</sub> <sup>-</sup>  | 0.83352            | 0.6566                        | yes                                                 |
| d Summer CHON/NO <sub>3</sub> <sup>-</sup>   | -0.14193           | -0.14317                      | no                                                  |
| d Summer CHONS/NO <sub>3</sub> <sup>-</sup>  | 0.63529            | 0.30419                       | no                                                  |
